# Supplementary material
Source: Springer Nature journal article supplement (https://www.springermedizin.de/resource/supplementary/12958_2014_1244_MOESM4_ESM.docx/9567124)
Supplement: MOESM4 [file 9567124]

| Group 1  Time < 120 days |  | Cycles of treatment | | |  |
| --- | --- | --- | --- | --- | --- |
|  | **N** | **1st cycle** | **2nd Cycle** | **3rd Cycle** | P (linear trend) |
| Age (years) | 68 | 40.2 ± 4.4 | 40.4 ± 4.3 | 40.5 ± 4.3 | 0.001 |
| FSH Dose (units) | 68 | 6519 ± 2202 | 6486 ± 2344 | 7381 ± 2355 | 0.05 |
| No Oocytes | 68 | 23 (33.8)a | 17 (25.0) | 11 (16.2)a | 0.024 |
| Oocyte (total) | 68 | 2.81 (2.02 - 3.60)b,c | 3.84 (2.88 - 4.80)b | 4.50 (3.48 - 5.53)c | 0.001 |
| Embryos transferred | 68 | 1.10 (0.78-1.42)b | 1.37 (0.99-1.74) | 1.59 (1.2-1.95)b | 0.004 |
| Cancelled Cycles | 68 | 32.4% (23-42)d | 18% (8-27) | 13% (4-23)d | 0.006 |
| Group 2  Time ≥ 120 days | | | | | |
| Age (years) | 17 | 41.6 ± 3.2 | 42.2 ± 3.0 | 42.5 ± 3.2 | 0.001 |
| FSH Dose (units) | 17 | 6965 ± 2712 | 6520 ± 2288 | 5070 ± 2714 | 0.08 |
| No Oocytes | 17 | 2 (11.8) | 4 (23.5) | 5 (29.4) | 0.22 |
| Oocyte (total) | 17 | 4.35 (2.78 – 5.92) | 3.35 (1.78 - 4.93) | 2.77 (1.19 – 4.33) | 0.185 |
| Embryos transferred | 17 | 1.24 (0.62-1.85) | 1.06 (0.44-1.67) | 0.82 (0.21-1.44) | 0.60 |
| Cancelled Cycles | 17 | 0 | 0 | 18% (7-29) | 0.028 |
